# Supplementary material for: Gene drive inhibition by the anti-CRISPR proteins AcrIIA2 and AcrIIA4 in Saccharomyces cerevisiae
Source: PubMed Central journal article supplement (PMC5982135; doi:10.1099/mic.0.000635), 2018-02-28
Supplement: mic-164-464-s001.pdf [file mic-164-464-s001.pdf]

## SUPPORTING INFORMATION

For

# **Gene drive inhibition by the anti-CRISPR proteins AcrIIA2 and AcrIIA4 in *Saccharomyces cerevisiae***

Erianna M. Basgall<sup>1†</sup>, Samantha C. Goetting<sup>1†</sup>, Megan E. Goeckel<sup>1†</sup>, Rachael M. Giersch<sup>2</sup>, Emily Roggenkamp<sup>1</sup>, Madison N. Schrock<sup>1</sup>, Megan Halloran<sup>1</sup>, and Gregory C. Finnigan<sup>1\*</sup>

<sup>1</sup>Department of Biochemistry and Molecular Biophysics, 141 Chalmers Hall, Kansas State University, Manhattan, KS 66506 USA

<sup>2</sup>Department of Biology, 116 Ackert Hall, Kansas State University, Manhattan, KS 66506 USA

<sup>†</sup>Authors contributed equally

\*Correspondence to: Gregory C. Finnigan, Phone: (785) 532-6939; FAX: (785) 532-7278; E-mail: [gfinnigan@ksu.edu](mailto:gfinnigan@ksu.edu)

**Figure S1.** Cas9 and sgRNA expression cassette sequences used in this study.

*S. pyogenes* Cas9 (yeast codon bias): Red highlights, START, STOP codons. Purple text, SV40 NLS sequence.

**ATG**GATAAGAAATACTCTATCGGTTTGGATATTGGTACAAATTCAGTTGGTTGGGCAGTTATTACTGATGAATACAA  
GGTTCCATCTAAAAAGTTTAAAGTTTTGGGTAACACTGATAGACATTCTATTAAGAAAAATTTGATTGGTGCTTTGT  
TATTTGATTCTGGTGAACACTGCTGAAGCAACAAGATTGAAAAGAAGTCAAGAAGAAGATACACAAGAAGAAAGAAT  
AGAATCTGTTATTTGCAAGAAATTTTCTCTAACGAAATGGCTAAGGTTGATGATTCTTTCTTTCATAGATTGGAAGA  
ATCATTTTTAGTTGAAGAAGATAAGAAACATGAAAGACATCCAATCTTCGGTAACATCGTTGATGAAGTTGCTTACC  
ATGAAAAGTACCCAACAATCTATCATTGAGAAAGAAATTTGGTTGATTCAACTGATAAGGCAGATTTGAGATTGATA  
TATTTGGCTTTAGCACATATGATCAAGTTTLAGAGGTCATTTCTTGATCGAGGGTGACTTGAATCCAGATAATTCTGA  
TGTTGATAAGTTGTTTATTCAATTAGTTCAAACATATAATCAATTGTTTGAAGAAAATCCAATTAATGCTTCTGGTG  
TTGATGCTAAGGCAATCTTGTGCAAGATTGTCTAAGTCAAGAAGATTGGAAAATTTGATCGCTCAATTACCAGGT  
GAAAAGAAAAATGGTTTGTTCGGTAATTTGATCGCATTGTCTTTGGGTTTGACACCAAACCTCAAGTCAAACCTCGA  
TTTGGCTGAAGATGCAAAGTTGCAATTGTCTAAGGATACTTACGATGATGATTTGGATAATTTGTTGGCTCAAATTG  
GTGACCAATATGCAGATTTGTTTTGGCTGCTAAAAATTTGTCTGATGCTATCTTGTGTCAGATATCTTGAGAGTT  
AACACTGAAATCACAAAGGCTCCATTGTCTGCATCAATGATCAAGAGATACGATGAACATCATCAAGATTTGACTTT  
GTTGAAGGCATTGGTTAGACAACAATTACCAGAAAAGTACAAGGAAATTTCTTTGATCAATCTAAAAATGGTTATG  
CTGGTTACATTGATGGTGGTGCATCTCAAGAAGAATTTCTACAAGTTTATTAAGCCAATCTTGGAAAAGATGGATGGT  
ACAGAAGAATTGTTAGTTAAATTTGAACAGAGAAGATTTGTTAAGAAAACAAAGAAGCTTTTCGATAACGGTCTATCCC  
ACATCAAATCCATTTGGGTGAATTACATGCTATCTTGAGAAGACAAGAAGATTTCTACCCATTTTAAAGGATAACA  
GAGAAAAGATTGAAAAGATTTTGACTTTTAGAATTCATATTACGTTGGTCCATTAGCTCGTGGTAATTCTAGATTT  
GCATGGATGACTAGAAAAGTCAGAAGAACTATCACACCATGGAATTTTGAAGAAGTTGTTGATAAAGGTGCTTCTGC  
ACAATCTTTTATTGAAAGAATGACAAACTTCGATAAAAAATTTGCCAAACGAAAAGGTTTGGCAAAGCATTCTATTGT  
TATATGAATACTTTACTGTTTACAATGAATTTGACAAAAGTTAAATATGTTACTGAGGGTATGAGAAAACCCAGCATTT  
TTGTCTGGTGAACAAAAGAAAGCAATCGTTGATTTGTTGTTTAAAACCTAACAGAAAGGTTACAGTTAAACAATTGAA  
AGAAGATTACTTTAAGAAAATTTGAATGTTTTGATTCTGTTGAAATTTTCAGGTGTTGAAGATAGATTCAATGCTTCAT  
TAGGTACTTACCATGATTTGTTGAAGATTATTAAGGATAAAGATTTCTTGGATAATGAAGAAAATGAAGATATTTTA  
GAAGATATTGTTTTAACTTTGACATTATTTGAAGATAGAGAAATGATCGAAGAAAAGATTGAAGACATACGCTCATT  
GTTTCGATGATAAAGTTATGAAGCAATTGAAGAGAAGAAGATACACTGGTTGGGGTAGATTGTCTAGAAAAGTTGATTA  
ATGGTATCAGAGATAAGCAATCTGGTAAAACAATCTTGGATTTCTTGAAGTCAGATGGTTTTCGCAAACAGAACTTC  
ATGCAATTGATTCATGATGATTCATTGACTTTTAAAGAAGATATCCAAAAGCTCAAGTTTCTGGTCAGGGTGACTC  
ATTGCATGAACATATTGCTAATTTGGCAGGTTCTCCAGCTATTAAGAAAGGTATCTTGCAAACAGTTAAGGTTGTTG  
ATGAATTAGTTAAAGTTATGGGTAGACATAAGCCAGAAAACATCGTTATCGAAATGGCTAGAGAAAACCAAACCTACA  
CAAAGGGTCAAAGAATTCAGAGAAAAGAAATGAAGAGAATCGAAGAAGGTATTAAGAATTTGGGTTCTCAAATCTT  
GAAGGAACATCCAGTTGAAAACACTCAATTGCAAACGAAAAGTTGACTTATACTACTTACAAAACGGTAGAGATA  
TGTACGTTGATCAAGAATTAGATATCAACAGATTGTGAGATTACGATGTTGATCATATCGTTCCACAATCATTTTTTG  
AAGGATGATTCATCGATAATAAGGTTTTGACAAGATCTGATAAGAACCGTGGTAAATCTGATAATGTTCCATCAGA  
AGAAGTTGTTAAGAAAATGAAGAAGTACTGGAGACAATTGTTAAATGCTAAGTTGATCACTCAAAGAAAAGTTTCGATA  
ATTTGACAAAAGCTGAAAGAGGTGGTTTTGTGAGAATTAGATAAAGCAGGTTTTTATTAAGAGACAATTAGTTGAACT  
AGACAAATCACAAAGCATGTTGCACAAATCTTGGATTCTAGAATGAACACTAAATATGATGAAAATGATAAATTAAT  
TAGAGAAGTTAAAGTTATTACATTAATACTAAATTTGGTTTTAGATTTTAGAAAAGATTTTCAATTTCTACAAAGTTA  
GAGAAATTAATAACTATCATCATGCTCATGATGCATACTTGAATGCTGTTGTTGGTACTGCATTGATTAAGAAATAC  
CCAAAGTTGGAATCTGAATTCGTTTACGGTACTACAAGGTTTACGATGTTAGAAAAGATGATCGCTAAGTCAGAACA  
AGAAATCGGTAAAGCTACAGCAAAGTATTTCTTTTATTCTAACATCATGAATTTCTTTAAAACCTGAAATTACATTAG  
CTAACGGTGAATCAGAAAAGACCATTGATCGAAAATAATGGTGAACAGGTGAAATTTGTTGGGATAAAGGTAGA  
GATTTTCGCAACTGTTAGAAAAGGTTTTGTCAATGCCACAAGTTAACATCGTTAAGAAAACCTGAAGTTCAAACAGGTGG  
TTTTTCTAAGGAATCAATCTTGCCAAAGAGAACTCTGATAAGTTGATTGCTAGAAAAGAAAGATTGGGATCCAAAGA  
AATATGGTGGTTTTGATTCTCCAATGTTGCTTACTCAGTTTTAGTTGTTGCAAAGGTTGAAAAGGGTAAATCTAAG  
AAATTGAAATCAGTTAAAGAATTTGTTAGGTATCACAAATCATGGAAAGATCTTCATTCGAAAAGAATCCAATCGATTT  
CTTGAAGCAAAGGTTTACAAGGAAGTTAAGAAAGATTTGATTATTAAGTTGCCAAAGTACTCTTTGTTGCAATTAG  
AAAACGGTAGAAAAGAATGTTAGCTTCAGCTGGTGAATTGCAAAGGGTAATGAATTGGCTTTGCCATCTAAGTAC  
GTTAATTTCTTGATTTGGCATCTCATTACGAAAAGTTGAAGGGTTACCAGAAGATAATGAACAAAACAATTGTT  
CGTTGAACAACATAAGCATTATTTGGATGAAATTTATGAACAAATTTCTGAATTTTCAAAGAGATTTTGGCTG  
ATGCAAATTTGGATAAGGTTTTGTCTGCTTACAATAAGCATAGAGATAAGCCAATCAGAGAACAAGCAGAAAACATC

ATCCATTTGTTTACTTTGACAAATTTGGGTGCTCCAGCTGCTTTTAAATACTTCGATACTACAATCGATAGAAAAAG  
ATACACTTCTACAAAGGAAGTTTTGGATGCAACATTGATCCATCAATCAATCACTGGTTTGTATGAAACAAGAATTG  
ATTTGTCTCAATTGGGTGGTGACT**TCTAGGGCAGACCCAAAGAAAAAGAGGAAAGTA****TAA**

*S. pyogenes* sgRNA cassette [u2]: Orange (bold) text, SNR52 promoter sequence; Blue highlighted text, crRNA guide sequence; Pale blue text, tracrRNA; Green (bold) text, SUP4 terminator sequence; Black (bold, underlined), flanking restriction sites.

**GGATCC**TCACTAAAGGGAACAAAAGCTGGAGCT**TCTTTGAAAAGATAATGTATGATTATGCTTTCACTCATATTTAT**  
**ACAGAAACTTGATGTTTTCTTTTCGAGTATATACAAGGTGATTACATGTACGTTTGAAGTACAACCTAGATTTTGTA**  
**GTGCCCTCTTGGGCTAGCGGTAAAGGTGCGCATTTTTTACACCCTACAATGTTCTGTTCAAAGATTTTGGTCAA**  
**CGCTGTAGAAGTGAAAGTTGGTGCGCATTTTTCGGCGTTCGAAACTTCTCCGCAGTGAAAGATAAATGATC****GCTGTT**  
**CGTGTGCGCGTCTT**GTTTTAGAGCTAGAAATAGCAAGTTAAAATAAGGCTAGTCCGTTATCAACTTGAAAAAGTGGC  
ACCGAGTCGGTGGTGCTTTTTTTGTTTTTAT**GTCT**TCGAGTCATGTAATTAGTTATGTCACGC**CTCGAG**

*S. pyogenes* sgRNA cassette [u1]:

**GGATCC**TCACTAAAGGGAACAAAAGCTGGAGCT**TCTTTGAAAAGATAATGTATGATTATGCTTTCACTCATATTTAT**  
**ACAGAAACTTGATGTTTTCTTTTCGAGTATATACAAGGTGATTACATGTACGTTTGAAGTACAACCTAGATTTTGTA**  
**GTGCCCTCTTGGGCTAGCGGTAAAGGTGCGCATTTTTTACACCCTACAATGTTCTGTTCAAAGATTTTGGTCAA**  
**CGCTGTAGAAGTGAAAGTTGGTGCGCATTTTTCGGCGTTCGAAACTTCTCCGCAGTGAAAGATAAATGATC****CGGTGG**  
**ACTTCGGCTACGTA**GTTTTAGAGCTAGAAATAGCAAGTTAAAATAAGGCTAGTCCGTTATCAACTTGAAAAAGTGGC  
ACCGAGTCGGTGGTGCTTTTTTTGTTTTTAT**GTCT**TCGAGTCATGTAATTAGTTATGTCACGC**CTCGAG**

***S. pyogenes* Cas9**

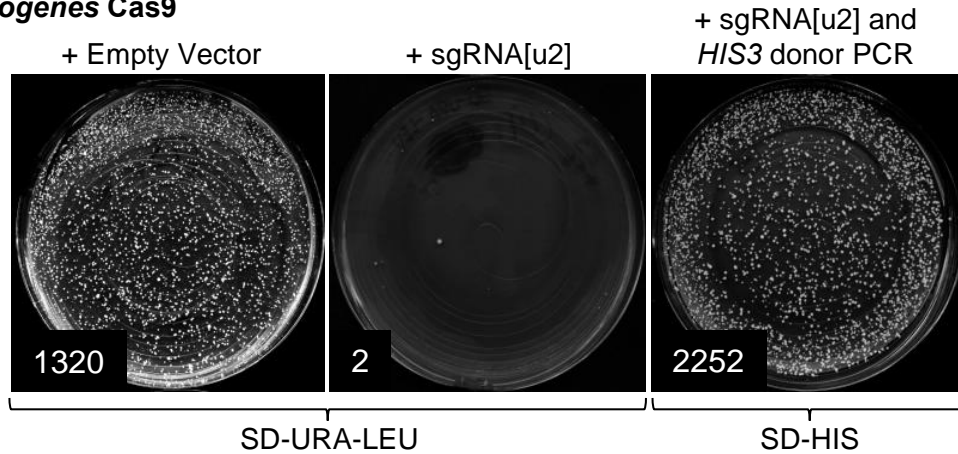

**Figure S2.** Example editing plates (*S. pyogenes* Cas9) from Fig. 1. A sample SD-URA-LEU (repair via NHEJ) or SD-HIS (repair via HDR) plate are illustrated after 3-5 days of incubation at 30°C. Empty Vector, pRS425. Plasmid harboring sgRNA[u2], pGF-V809. *HIS3* PCR includes approximately 1,000 bp of 5' and 3' UTR.

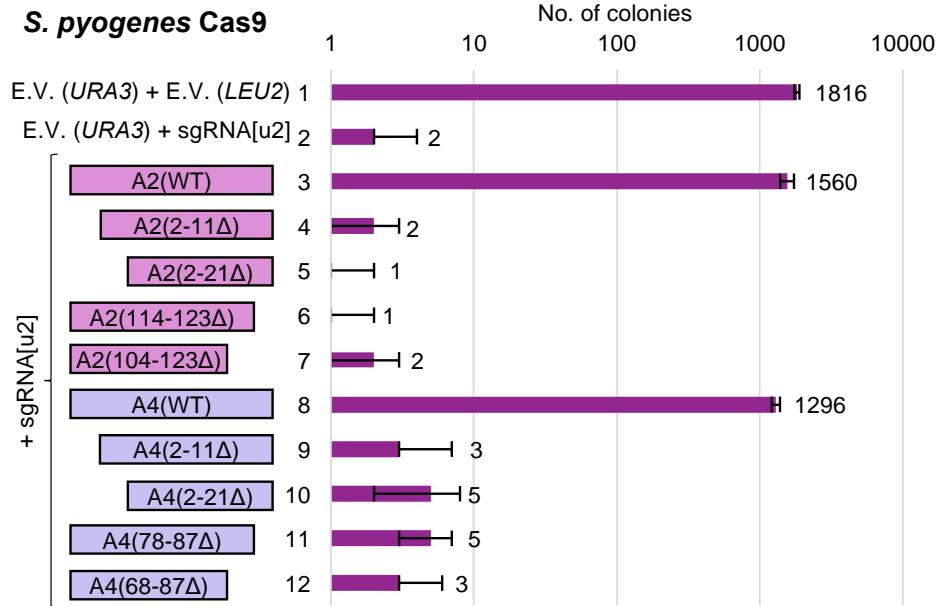

**Figure S3.** Small deletions of the AcrIIA2 and AcrIIA4 proteins are not tolerated *in vivo* and disrupt the ability to inhibit *S. pyogenes* Cas9 editing. 10 or 20 residues were removed from the A2 and A4 N- or C-termini and expressed *in vivo* on a plasmid under the *CDC11* promoter (pGF-IVL1388 to pGF-IVL1395). Vectors were transformed into yeast harboring an inducible *S. pyogenes* Cas9 expression cassette (GFY-2383). Editing in haploid yeast was performed using the sgRNA[u2] vector (pGF-V809). Yeast were plated onto SD-URA-LEU media and the total number of surviving cells were quantified in triplicate. Error, SD.

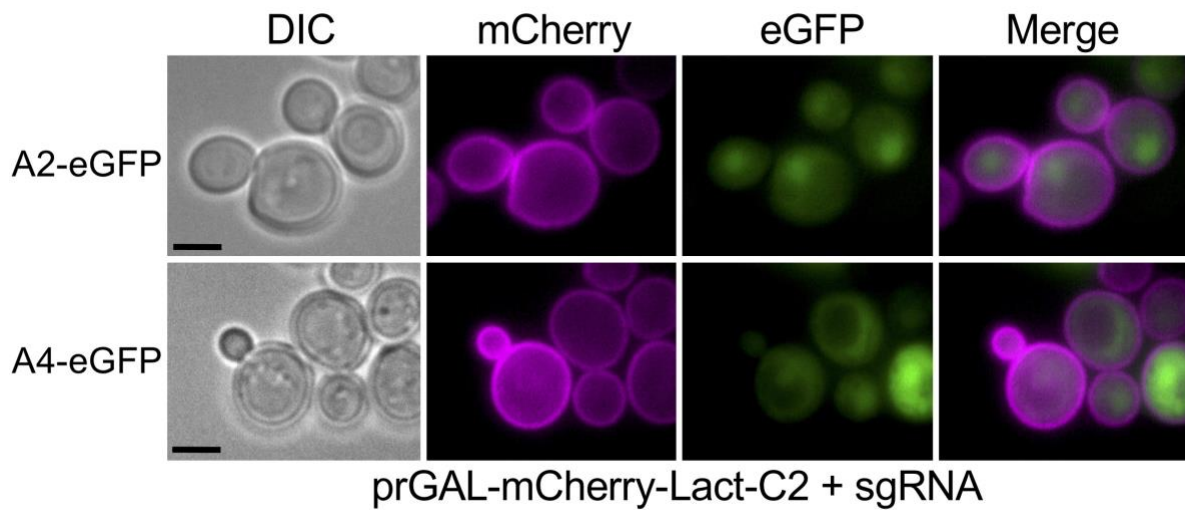

**Figure S4.** GFP-tagged AcrIIA2 and AcrIIA4 proteins are not recruited to the plasma membrane by mCherry or the LactC2 domain. A strain (GFY-3268) was created which included an mCherry-LactC2 fusion under control of the *GAL1/10* promoter at the *HIS3* locus. Plasmids expressing (i) C-terminally tagged AcrIIA2 or AcrIIA4 (pGF-IVL1386 and pGF-IVL1387) and (ii) sgRNA[u1] (pGF-IVL1220) were transformed into yeast. Cultures were pre-induced overnight in raffinose/sucrose lacking uracil and leucine, back-diluted to medium containing galactose and lacking uracil and leucine, and were grown for 4.5 hr at 30°C. Cells were harvested, washed with water, and imaged by fluorescence microscopy. Representative images are shown. Scale bar, 3  $\mu\text{m}$ .

Table S1. Yeast strains used in this study.

| Strain                | Genotype                                                                                                                                | Reference  |
|-----------------------|-----------------------------------------------------------------------------------------------------------------------------------------|------------|
| BY4741                | <i>MATa his3Δ1 leu2Δ0 met15Δ0 ura3Δ0</i>                                                                                                | [1]        |
| BY4742                | <i>MATa his3Δ1 leu2Δ0 lys2Δ0 ura3Δ0</i>                                                                                                 | [1]        |
| GFY-2383 <sup>a</sup> | BY4741;<br><i>his3Δ::(u2)::prGAL1/10::SpCas9::NLS::ADH1(t)::Kan<sup>R</sup>::(u2)::HIS3(t)</i>                                          | This study |
| GFY-3206 <sup>b</sup> | BY4742;<br><i>his3Δ::(u1)::prCDC12::mCherry::NLS::SHS1(t)::prCCW12::SpHIS5::MX(t)::(u1)::HIS3(t)</i>                                    | This study |
| GFY-3207 <sup>b</sup> | BY4742; <i>his3Δ::(u1)::prCDC12::mCherry::SHS1(t)::prCCW12::SpHIS5::MX(t)::(u1)::HIS3(t)</i>                                            | This study |
| GFY-3285 <sup>c</sup> | BY4741;<br><i>his3Δ::(u2)::prGAL1/10::SpCas9::NLS::ADH1(t)::prMET25::AcrIIA2::CDC10(t)::prMX::Kan<sup>R</sup>::MX(t)::(u1)::HIS3(t)</i> | This study |
| GFY-3287 <sup>c</sup> | BY4741;<br><i>his3Δ::(u2)::prGAL1/10::SpCas9::NLS::ADH1(t)::prMET25::AcrIIA4::CDC10(t)::prMX::Kan<sup>R</sup>::MX(t)::(u1)::HIS3(t)</i> | This study |
| GFY-3104 <sup>d</sup> | BY4741;<br><i>his3Δ::(u2)::prGAL1/10::dCas9(D10A H840A)::mCherry::LactC2(1-158)::ADH1(t)::Kan<sup>R</sup>::(u2)::HIS3(t)</i>            | This study |
| GFY-3268 <sup>d</sup> | BY4741;<br><i>his3Δ::(u2)::prGAL1/10::mCherry::LactC2(1-158)::ADH1(t)::Kan<sup>R</sup>::(u2)::HIS3(t)</i>                               | This study |

<sup>a</sup>Construction of GFY-2383 was performed by generation of a plasmid (pGF-IVL1192) containing the entire cassette including flanking *HIS3* UTR. The *Streptococcus pyogenes* Cas9 gene was synthesized *de novo* with a yeast codon bias. Two overlapping (120 bp within the Cas9 ORF) PCRs were amplified, digested with *DpnI*, transformed into WT BY4741 yeast, and selected on media containing G418. The artificial site [u2] was placed directly upstream of the *GALI/10* promoter sequence (814 bp) and downstream of the *MX(t)* sequence [2]. For GFY-2586 and GFY-2583, the [u2] sequence included the *Sp* Cas9 target site and PAM: 5' **GCTGTTTCGTGTGCGCGTCCTGGG** 3' (red underlined text is the PAM NGG). A C-terminal NLS (SRADPKKKRKV) was also included [3].

<sup>b</sup>Target yeast strains (GFY-3206 and GFY-3207) were constructed with flanking (u1) sites with the sequence: 5' ATGACGGTGGACTTCGGCTACGTA**GGG**CGATT 3'. 992 bp of the constitutive *CCW12* promoter were used to drive *S. pombe HIS5* expression.

<sup>c</sup>For strains GFY-3285 and GFY-3287, the following methodology was employed. First, plasmids harboring *ADH1(t)::prMET25::AcrIIA2::CDC10(t)::prCCW12::SpHIS5::MX(t)* (pGF-IVL1410) or the same construct with *AcrIIA4* (pGF-IVL1411) were generated [4], PCR amplified in overlapping fragments, *DpnI* treated, integrated into GFY-2383, and colonies were selected for survival on SD-HIS medium and sensitivity to G418. 384 bp of the *MET25* promoter were used. Second, the *HIS5* marker was replaced with the Kan<sup>R</sup> MX-based cassette using an amplified fragment containing *CDC10(t)::prMX::Kan<sup>R</sup>::MX(t)* (from pGF-IVL1412). There is a (u1) site downstream of the *MX(t)* sequence rather than a (u2) site.

<sup>d</sup>Construction of GFY-3104 and GFY-3268 included use of enzymatically dead Cas9 (D10A H840A). A modified site directed mutagenesis protocol [5] was used to introduce substitutions to the ORF in a pUC57 vector prior to *in vivo* plasmid assembly. The LactC2 [6, 7] domain was amplified from pGF-IVL687. The constructs were integrated into the yeast genome as previously described.



Table S2. Plasmids used in this study.

| Plasmid                  | Description                                                     | Reference  |
|--------------------------|-----------------------------------------------------------------|------------|
| pRS425                   | <i>2μ, LEU2</i>                                                 | [8]        |
| pRS316                   | <i>CEN URA3</i>                                                 | [9]        |
| pGF-V809 <sup>a</sup>    | pRS425; <i>prSNR52::Sp-sgRNA(u2-20 WT)::SUP4(t)</i>             | This study |
| pGF-IVL1336 <sup>b</sup> | pRS316; <i>prCDC11::AcrIIA2::ADH1(t)::Hyg<sup>R</sup></i>       | This study |
| pGF-IVL1337 <sup>b</sup> | pRS316; <i>prCDC11::AcrIIA4::ADH1(t)::Hyg<sup>R</sup></i>       | This study |
| pGF-IVL1384 <sup>c</sup> | pRS316; <i>prCDC11::GFP::AcrIIA2::ADH1(t)::Hyg<sup>R</sup></i>  | This study |
| pGF-IVL1385 <sup>c</sup> | pRS316; <i>prCDC11::GFP::AcrIIA4::ADH1(t)::Hyg<sup>R</sup></i>  | This study |
| pGF-IVL1386 <sup>d</sup> | pRS316; <i>prCDC11::AcrIIA2::eGFP::ADH1(t)::Hyg<sup>R</sup></i> | This study |
| pGF-IVL1387 <sup>d</sup> | pRS316; <i>prCDC11::AcrIIA4::eGFP::ADH1(t)::Hyg<sup>R</sup></i> | This study |
| pGF-V1399 <sup>e</sup>   | pRS316; <i>prCDC11::AcrIIA2(L122A K123A)::ADH1(t)</i>           | This study |
| pGF-V1400                | pRS316; <i>prCDC11::AcrIIA2(S120A E121A)::ADH1(t)</i>           | This study |
| pGF-V1401                | pRS316; <i>prCDC11::AcrIIA2(L118A K119A)::ADH1(t)</i>           | This study |
| pGF-V1402                | pRS316; <i>prCDC11::AcrIIA2(I116A I117A)::ADH1(t)</i>           | This study |
| pGF-V1403                | pRS316; <i>prCDC11::AcrIIA2(Q114A E115A)::ADH1(t)</i>           | This study |
| pGF-V1404                | pRS316; <i>prCDC11::AcrIIA2(G112A N113A)::ADH1(t)</i>           | This study |
| pGF-V1405                | pRS316; <i>prCDC11::AcrIIA2(K110A S111A)::ADH1(t)</i>           | This study |
| pGF-V1406                | pRS316; <i>prCDC11::AcrIIA2(E108A M109A)::ADH1(t)</i>           | This study |
| pGF-V1407                | pRS316; <i>prCDC11::AcrIIA2(E106A D107A)::ADH1(t)</i>           | This study |
| pGF-V1408                | pRS316; <i>prCDC11::AcrIIA2(E101A D105A)::ADH1(t)</i>           | This study |
| pGF-V1409                | pRS316; <i>prCDC11::AcrIIA2(D99A L100A)::ADH1(t)</i>            | This study |

|           |                                                     |            |
|-----------|-----------------------------------------------------|------------|
| pGF-V1410 | pRS316; <i>prCDC11::AcrIIA2(I97A D98A)::ADH1(t)</i> | This study |
| pGF-V1411 | pRS316; <i>prCDC11::AcrIIA2(E72A V75A)::ADH1(t)</i> | This study |
| pGF-V1412 | pRS316; <i>prCDC11::AcrIIA2(D65A D71A)::ADH1(t)</i> | This study |
| pGF-V1413 | pRS316; <i>prCDC11::AcrIIA2(E63A Y64A)::ADH1(t)</i> | This study |
| pGF-V1414 | pRS316; <i>prCDC11::AcrIIA2(D60A E61A)::ADH1(t)</i> | This study |
| pGF-V1415 | pRS316; <i>prCDC11::AcrIIA2(E93A D96A)::ADH1(t)</i> | This study |
| pGF-V1416 | pRS316; <i>prCDC11::AcrIIA2(D76A D81A)::ADH1(t)</i> | This study |
| pGF-V1417 | pRS316; <i>prCDC11::AcrIIA2(D38A D40A)::ADH1(t)</i> | This study |
| pGF-V1418 | pRS316; <i>prCDC11::AcrIIA2(E25A E26A)::ADH1(t)</i> | This study |
| pGF-V1419 | pRS316; <i>prCDC11::AcrIIA2(D22A D23A)::ADH1(t)</i> | This study |
| pGF-V1420 | pRS316; <i>prCDC11::AcrIIA2(E12A E16A)::ADH1(t)</i> | This study |
| pGF-V1421 | pRS316; <i>prCDC11::AcrIIA4(L86A N87A)::ADH1(t)</i> | This study |
| pGF-V1422 | pRS316; <i>prCDC11::AcrIIA4(S84A E85A)::ADH1(t)</i> | This study |
| pGF-V1423 | pRS316; <i>prCDC11::AcrIIA4(L82A K83A)::ADH1(t)</i> | This study |
| pGF-V1424 | pRS316; <i>prCDC11::AcrIIA4(I80A T81A)::ADH1(t)</i> | This study |
| pGF-V1425 | pRS316; <i>prCDC11::AcrIIA4(Q78A T79A)::ADH1(t)</i> | This study |
| pGF-V1426 | pRS316; <i>prCDC11::AcrIIA4(D76A M77A)::ADH1(t)</i> | This study |
| pGF-V1427 | pRS316; <i>prCDC11::AcrIIA4(Y74A N75A)::ADH1(t)</i> | This study |
| pGF-V1428 | pRS316; <i>prCDC11::AcrIIA4(E72A F73A)::ADH1(t)</i> | This study |
| pGF-V1429 | pRS316; <i>prCDC11::AcrIIA4(E70A E71A)::ADH1(t)</i> | This study |
| pGF-V1430 | pRS316; <i>prCDC11::AcrIIA4(E68A D69A)::ADH1(t)</i> | This study |
| pGF-V1431 | pRS316; <i>prCDC11::AcrIIA4(E66A Y67A)::ADH1(t)</i> | This study |
| pGF-V1432 | pRS316; <i>prCDC11::AcrIIA4(N64A Q65A)::ADH1(t)</i> | This study |

|           |                                                     |            |
|-----------|-----------------------------------------------------|------------|
| pGF-V1433 | pRS316; <i>prCDC11::AcrIIA4(E49A V52A)::ADH1(t)</i> | This study |
| pGF-V1434 | pRS316; <i>prCDC11::AcrIIA4(E45A E47A)::ADH1(t)</i> | This study |
| pGF-V1435 | pRS316; <i>prCDC11::AcrIIA4(E40A Y41A)::ADH1(t)</i> | This study |
| pGF-V1436 | pRS316; <i>prCDC11::AcrIIA4(D37A G38A)::ADH1(t)</i> | This study |
| pGF-V1437 | pRS316; <i>prCDC11::AcrIIA4(T22A D23A)::ADH1(t)</i> | This study |
| pGF-V1438 | pRS316; <i>prCDC11::AcrIIA4(D14A Y15A)::ADH1(t)</i> | This study |
| pGF-V1439 | pRS316; <i>prCDC11::AcrIIA4(D5A E9A)::ADH1(t)</i>   | This study |
| pGF-V1470 | pRS316; <i>prCDC11::AcrIIA4(D14A)::ADH1(t)</i>      | This study |
| pGF-V1471 | pRS316; <i>prCDC11::AcrIIA4(N36A)::ADH1(t)</i>      | This study |
| pGF-V1472 | pRS316; <i>prCDC11::AcrIIA4(D37A)::ADH1(t)</i>      | This study |
| pGF-V1535 | pRS316; <i>prCDC11::AcrIIA4(G38A)::ADH1(t)</i>      | This study |
| pGF-V1536 | pRS316; <i>prCDC11::AcrIIA4(N39A)::ADH1(t)</i>      | This study |
| pGF-V1473 | pRS316; <i>prCDC11::AcrIIA4(E40A)::ADH1(t)</i>      | This study |
| pGF-V1474 | pRS316; <i>prCDC11::AcrIIA4(N48A)::ADH1(t)</i>      | This study |
| pGF-V1475 | pRS316; <i>prCDC11::AcrIIA4(D69A)::ADH1(t)</i>      | This study |
| pGF-V1476 | pRS316; <i>prCDC11::AcrIIA4(E70A)::ADH1(t)</i>      | This study |
| pGF-V1477 | pRS316; <i>prCDC11::AcrIIA4(E72A)::ADH1(t)</i>      | This study |
| pGF-V1534 | pRS316; <i>prCDC11::AcrIIA4(F73A)::ADH1(t)</i>      | This study |
| pGF-V1478 | pRS316; <i>prCDC11::AcrIIA4(D76A)::ADH1(t)</i>      | This study |
| pGF-V1479 | pRS316; <i>prCDC11::AcrIIA4(M77A)::ADH1(t)</i>      | This study |
| pGF-V1480 | pRS316; <i>prCDC11::AcrIIA4(D23R)::ADH1(t)</i>      | This study |
| pGF-V1481 | pRS316; <i>prCDC11::AcrIIA4(N39R)::ADH1(t)</i>      | This study |
| pGF-V1482 | pRS316; <i>prCDC11::AcrIIA4(D69R)::ADH1(t)</i>      | This study |

|                              |                                                                           |            |
|------------------------------|---------------------------------------------------------------------------|------------|
| pGF-V1483                    | pRS316; <i>prCDC11::AcrIIA4(E70R)::ADH1(t)</i>                            | This study |
| pGF-V1484                    | pRS316; <i>prCDC11::AcrIIA4(Y67A D69A)::ADH1(t)</i>                       | This study |
| pGF-V1485                    | pRS316; <i>prCDC11::AcrIIA4(D69A E70A)::ADH1(t)</i>                       | This study |
| pGF-V1220 <sup>f</sup>       | pRS425; <i>prSNR52::Sp-sgRNA(u1-20WT)::SUP4(t)</i>                        | This study |
| pGF-425+IVL1277 <sup>g</sup> | pRS425; <i>prSNR52::Sp-sgRNA(mCherry)::SUP4(t)</i>                        | [10]       |
| pGF-IVL1431                  | pRS316; <i>prCDC11::GFP::AcrIIA4(E70A E71A)::ADH1(t)::Hyg<sup>R</sup></i> | This study |
| pGF-IVL1432                  | pRS316; <i>prCDC11::GFP::AcrIIA4(E40A Y41A)::ADH1(t)::Hyg<sup>R</sup></i> | This study |
| pGF-IVL1433                  | pRS316; <i>prCDC11::GFP::AcrIIA4(D14A Y15A)::ADH1(t)::Hyg<sup>R</sup></i> | This study |
| pGF-IVL1388 <sup>h</sup>     | pRS316; <i>prCDC11::AcrIIA2(2-11Δ)::ADH1(t)::Hyg<sup>R</sup></i>          | This study |
| pGF-IVL1389                  | pRS316; <i>prCDC11::AcrIIA2(2-21Δ)::ADH1(t)::Hyg<sup>R</sup></i>          | This study |
| pGF-IVL1392                  | pRS316; <i>prCDC11::AcrIIA2(114-123Δ)::ADH1(t)::Hyg<sup>R</sup></i>       | This study |
| pGF-IVL1393                  | pRS316; <i>prCDC11::AcrIIA2(104-123Δ)::ADH1(t)::Hyg<sup>R</sup></i>       | This study |
| pGF-IVL1390                  | pRS316; <i>prCDC11::AcrIIA4(2-11Δ)::ADH1(t)::Hyg<sup>R</sup></i>          | This study |
| pGF-IVL1391                  | pRS316; <i>prCDC11::AcrIIA4::ADH1(t)::Hyg<sup>R</sup></i>                 | This study |
| pGF-IVL1394                  | pRS316; <i>prCDC11::AcrIIA4(78-87)::ADH1(t)::Hyg<sup>R</sup></i>          | This study |
| pGF-IVL1395                  | pRS316; <i>prCDC11::AcrIIA4(68-87)::ADH1(t)::Hyg<sup>R</sup></i>          | This study |

<sup>a</sup>The sgRNA cassette was constructed as previous described [2, 11]. Briefly, 269 bp of the *SNR52* promoter sequence, 20 bp of the *SUP4* terminator sequence, and appropriate crRNA and tracrRNA (per orthologous species used) were included. A guide sequence of 20 bp was used.

<sup>b</sup>The anti-CRISPR *AcrIIA2* and *AcrIIA4* genes were synthesized *de novo* with a yeast codon bias and cloned into *CEN*-based yeast expression vectors under control of the *CDC11* promoter using *in vivo* plasmid assembly.

<sup>c</sup>GFP includes the substitutions F64L and S65T.

<sup>d</sup>eGFP includes the substitutions F64L, S65T, R88Q, and H239L.

<sup>e</sup>The general cloning scheme for *AcrIIA2* and *AcrIIA4* mutants included the following. First, the *prCDC11::AcrIIA2/A4::ADH1(t)* fragment was sub-cloned into a TOPO II vector (pCR-Blunt II-TOPO, Life Technologies, Inc.). Second, substitutions were introduced using PCR. Third, the entire construct was sub-cloned to the pRS316 vector using the flanking *NotI/SpeI* sites.

<sup>f</sup>The sgRNA(u1) includes the crRNA: 5' CGGTGGACTTCGGCTACGTA 3'.

<sup>g</sup>The sgRNA(mCherry) includes the crRNA: 5' CAAGGAGTTCATGCGCTTCA 3'.

<sup>h</sup>For constructs containing an N-terminal or C-terminal deletion, residues were removed during *in vivo* plasmid assembly.

**Table S3:** Comparison of AcrIIA4 substitution mutants—effects on Cas9 binding, *in vitro* inhibition of *SpCas9*, and *in vivo* inhibition of a Cas9-based gene drive.

| <b>AcrIIA4 Residue(s)<sup>a</sup></b> | <b>This study</b>                                                                                                                                                   | <b>Dong <i>et al.</i>, 2017 [12]</b>                                        | <b>Yang and Patel, 2017 [13]</b>                                                                                                                                                                                                                                                                                                     |
|---------------------------------------|---------------------------------------------------------------------------------------------------------------------------------------------------------------------|-----------------------------------------------------------------------------|--------------------------------------------------------------------------------------------------------------------------------------------------------------------------------------------------------------------------------------------------------------------------------------------------------------------------------------|
| D5, E9, N12                           | D5A/E9A, no effect on inhibition <sup>b</sup>                                                                                                                       | N12T, no effect on binding <sup>c</sup> or inhibition function <sup>d</sup> | ND <sup>e</sup>                                                                                                                                                                                                                                                                                                                      |
| D14, K18, E40                         | D14A, no effect on inhibition; D14A/Y15A <sup>f</sup> , strong decrease in inhibition; E40A, no effect on inhibition; E40A/Y41A, very strong loss of all inhibition | D14R/E40R, slight decrease in binding, inhibition ND                        | D14A, minor/no loss of binding <sup>g</sup> , partial loss of inhibition <sup>h</sup> ; D14A/K18A, minor/no loss of binding, partial loss of inhibition; D14K, modest loss of binding, strong loss of inhibition; E40A, minor/no loss of binding, partial loss of inhibition; E40K, strong loss of binding, minor loss of inhibition |
| D23, N25, S26                         | D23R, very minor decrease in inhibition; T22A/D23A, no effect on inhibition                                                                                         | D23R, no effect on binding, decreased inhibition                            | D23A/S24A/N25A, minor/no loss of binding, partial loss of inhibition; D23K, minor/no loss of binding, minor loss of inhibition; N25K, minor/no loss of binding, modest loss of inhibition; S26K, minor/no loss of binding, strong loss of inhibition                                                                                 |
| N36                                   | N36A, no effect on inhibition                                                                                                                                       | N36Y, decreased binding, decreased inhibition;                              | ND                                                                                                                                                                                                                                                                                                                                   |

|                                   |                                                                                                              |                                                         |                                                                                                                                                                                                                    |
|-----------------------------------|--------------------------------------------------------------------------------------------------------------|---------------------------------------------------------|--------------------------------------------------------------------------------------------------------------------------------------------------------------------------------------------------------------------|
|                                   |                                                                                                              | N36R/D69R, decreased binding, inhibition ND             |                                                                                                                                                                                                                    |
| D37, G38                          | D37A, G38A and D37A/G38A, all have no effect on inhibition                                                   | G38A, no effect on binding, decreased inhibition        | ND                                                                                                                                                                                                                 |
| N39                               | N39A, minor decrease in inhibition; N39R, strong decrease in inhibition                                      | N39R, decreased binding, decreased inhibition           | N39A, minor/no loss of binding, moderate loss of inhibition; N39K, minor/no loss of binding, strong loss of inhibition                                                                                             |
| E40, Y41                          | E40A, no effect on inhibition; E40A/Y41A <sup>f</sup> , very strong loss of all inhibition                   | D14R/E40R, slight decrease in binding, inhibition ND    | E40A, minor/no loss of binding, partial loss of inhibition; E40K, strong loss of binding, minor loss of inhibition                                                                                                 |
| E45, E47, N48, E49, V52, N64, Q65 | E45A/E47A, N48A, E49A/V52A and N64A/Q65A, no effect on inhibition                                            | ND                                                      | ND                                                                                                                                                                                                                 |
| E66, Y67, E68                     | E66A/Y67A, no effect on inhibition; Y67A/D69A, strong loss of inhibition; E68A/D69A, no effect on inhibition | ND                                                      | Y67A/D69A/E70A, strong loss of binding, strong decrease in inhibition; N39A/Y67A/D69A/E70A, near total loss of binding, strong decrease in inhibition; Y67K, moderate loss of binding, moderate loss of inhibition |
| D69                               | D69A, no effect on inhibition; D69R, minor decrease in inhibition; E68A/D69A, no                             | D69R, slight decrease in binding, decreased inhibition; | Y67A/D69A/E70A, strong loss of binding, strong decrease in inhibition;                                                                                                                                             |

|                                                  |                                                                                                                                                                      |                                               |                                                                                                                                                                                                                 |
|--------------------------------------------------|----------------------------------------------------------------------------------------------------------------------------------------------------------------------|-----------------------------------------------|-----------------------------------------------------------------------------------------------------------------------------------------------------------------------------------------------------------------|
|                                                  | effect on inhibition;<br>D69A/E70A, very strong loss of all inhibition                                                                                               | N36R/D69R, decreased binding, inhibition ND   | N39A/Y67A/D69A/E70A, near total loss of binding, strong decrease in inhibition; D69K, minor/no loss of binding, strong decrease in inhibition                                                                   |
| E70                                              | E70A, strong loss of inhibition; E70R, very strong loss of inhibition; D69A/E70A, very strong loss of inhibition; E70A/E71A <sup>f</sup> , strong loss of inhibition | E70R, decreased binding, decreased inhibition | Y67A/D69A/E70A, strong loss of binding, strong decrease in inhibition; N39A/Y67A/D69A/E70A, near total loss of binding, strong decrease in inhibition; E70K, moderate loss of binding, minor loss of inhibition |
| E71, E72, F73                                    | E70A/E71A, strong loss of inhibition; E72A, no effect on inhibition; E72A/F73A and F73A, moderate loss of inhibition                                                 | ND                                            | ND                                                                                                                                                                                                              |
| Y74, N75, D76                                    | Y74A/N75A and D76A, no effect on inhibition                                                                                                                          | ND                                            | ND                                                                                                                                                                                                              |
| M77                                              | M77A and D76A/M77A, moderate loss of inhibition                                                                                                                      | ND                                            | ND                                                                                                                                                                                                              |
| Q78, T79, I80, T81, L82, K83, S84, E85, L86, N87 | Q78A/T79A, I80A/T81A, L82A/K83A, S84A/E85A, and L86A/N87A, all show no effect on inhibition                                                                          | ND                                            | ND                                                                                                                                                                                                              |

<sup>a</sup>AcrIIA4 mutant substitutions are listed (in general) from residue 1 to 87. Groupings of more than one residue are for clarity: some combinations were only tested in combinations with other



residues. Several residues are found within multiple categories if they occur as part of double/triple/quadruple substitutions.

<sup>b</sup>The *in vivo* assay used in this study (Fig. 5) to provide a quantification of AcrIIA4 inhibitory function *S. pyogenes* Cas9 is by halting an active gene drive in diploid yeast after 5 hrs of nuclease induction.

<sup>c</sup>This study [12] used a GST pull-down assay to determine preloaded sgRNA-bound Cas9/AcrIIA4 binding (AcrIIA4 was fused to GST). Our interpretation of the amount of bound AcrIIA4 is from Extended Data Figure 3, part B, by comparing to control lanes.

<sup>d</sup>This study [12] utilized an *in vitro* DNA cleavage assay to illustrate the inhibitory effect of AcrIIA4 on Cas9. Our interpretation of the level of (remaining) inhibition of Cas9 nuclease activity is based Extended Data Figure 3, part C, by comparing to control lanes.

<sup>e</sup>ND, not determined.

<sup>f</sup>For several double mutant combinations, we tested the sgRNA loaded dCas9/AcrIIA4 association by an *in vivo* fluorescence localization assay (Fig. 6). All three mutants displayed a total loss of Cas9 association as determined by a lack of PM-localization.

<sup>g</sup>This study [13] performed an *in vitro* MBP-binding assay to Cas9 (AcrIIA4 fused to MBP). Our interpretation of the amount of bound AcrIIA4 is from Figures 3G and S3E by comparing to control lanes.

<sup>h</sup>This study [13] utilized an *in vitro* DNA cleavage assay using sgRNA-bound Cas9 and AcrIIA4. Our interpretation of the amount of AcrIIA4 inhibitory activity is from Figures 3H and S3F, by comparing to control lanes.

## REFERENCES

- 1 Brachmann CB, Davies A, Cost GJ, Caputo E, Li J, Hieter P, *et al.* Designer deletion strains derived from *Saccharomyces cerevisiae* S288C: a useful set of strains and plasmids for PCR-mediated gene disruption and other applications. *Yeast* 1998;14(2):115-32.
- 2 Finnigan GC, Thorner J. mCAL: A new approach for versatile multiplex action of Cas9 using one sgRNA and loci flanked by a programmed target sequence. *G3* 2016;6(7):2147-56.
- 3 Kalderon D, Roberts BL, Richardson WD, Smith AE. A short amino acid sequence able to specify nuclear location. *Cell* 1984;39(3 Pt 2):499-509.
- 4 Finnigan GC, Thorner J. Complex *in vivo* ligation using homologous recombination and high-efficiency plasmid rescue from *Saccharomyces cerevisiae*. *Bio Protoc* 2015;5(13):e1521. <http://www.bio-protocol.org/e>.
- 5 Zheng L, Baumann U, Reymond JL. An efficient one-step site-directed and site-saturation mutagenesis protocol. *Nucleic Acids Res* 2004;32(14):e115.
- 6 Andersen MH, Graversen H, Fedosov SN, Petersen TE, Rasmussen JT. Functional analyses of two cellular binding domains of bovine lactadherin. *Biochemistry* 2000;39(20):6200-6.
- 7 Shao C, Novakovic VA, Head JF, Seaton BA, Gilbert GE. Crystal structure of lactadherin C2 domain at 1.7Å resolution with mutational and computational analyses of its membrane-binding motif. *J Biol Chem* 2008;283(11):7230-41.
- 8 Christianson TW, Sikorski RS, Dante M, Shero JH, Hieter P. Multifunctional yeast high-copy-number shuttle vectors. *Gene* 1992;110(1):119-22.
- 9 Sikorski RS, Hieter P. A system of shuttle vectors and yeast host strains designed for efficient manipulation of DNA in *Saccharomyces cerevisiae*. *Genetics* 1989;122(1):19-27.
- 10 Roggenkamp E, Giersch RM, Wedeman E, Eaton M, Turnquist E, Schrock MN, *et al.* CRISPR-UnLOCK: multipurpose Cas9-Based strategies for conversion of yeast libraries and strains. *Front Microbiol* 2017;8:1773.
- 11 DiCarlo JE, Norville JE, Mali P, Rios X, Aach J, Church GM. Genome engineering in *Saccharomyces cerevisiae* using CRISPR-Cas systems. *Nucleic Acids Res* 2013;41(7):4336-43.

- 12 Dong, Guo M, Wang S, Zhu Y, Wang S, Xiong Z, *et al.* Structural basis of CRISPR-SpyCas9 inhibition by an anti-CRISPR protein. *Nature* 2017;546(7658):436-9.
- 13 Yang H, Patel DJ. Inhibition Mechanism of an Anti-CRISPR Suppressor AcrIIA4 Targeting SpyCas9. *Mol Cell* 2017;67(1):117-127.
